# Supplementary material
Source: PubMed Central journal article supplement (PMC7751572)
Supplement: NIHMS1653841-supplement-Supp_Material.pdf [file NIHMS1653841-supplement-Supp_Material.pdf]

**Supplemental Figure S1. CONSORT study schema.**

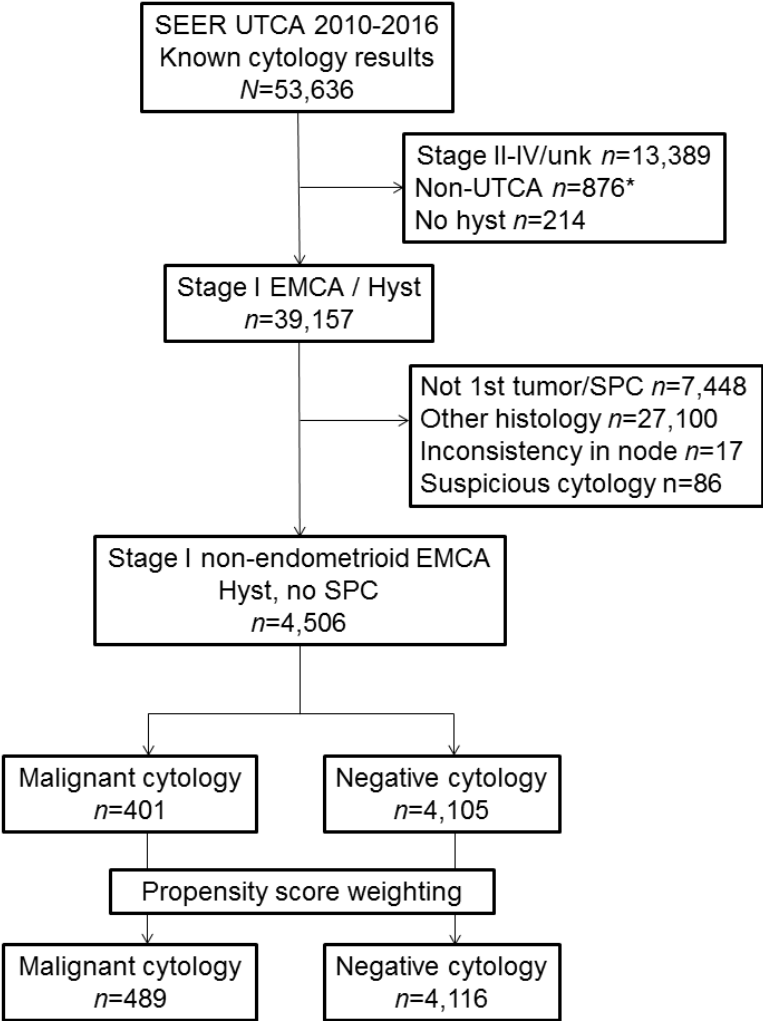

\*including uterine sarcoma. Abbreviations: SEER, Surveillance, Epidemiology, and End Result Program; UTCA, uterine cancer; unk, unknown; EMCA, endometrial cancer; SPC, secondary primary cancer; cytology; peritoneal cytology; and hyst, hysterectomy.

**Supplemental Figure S2. A regression-tree model for malignant peritoneal cytology.**

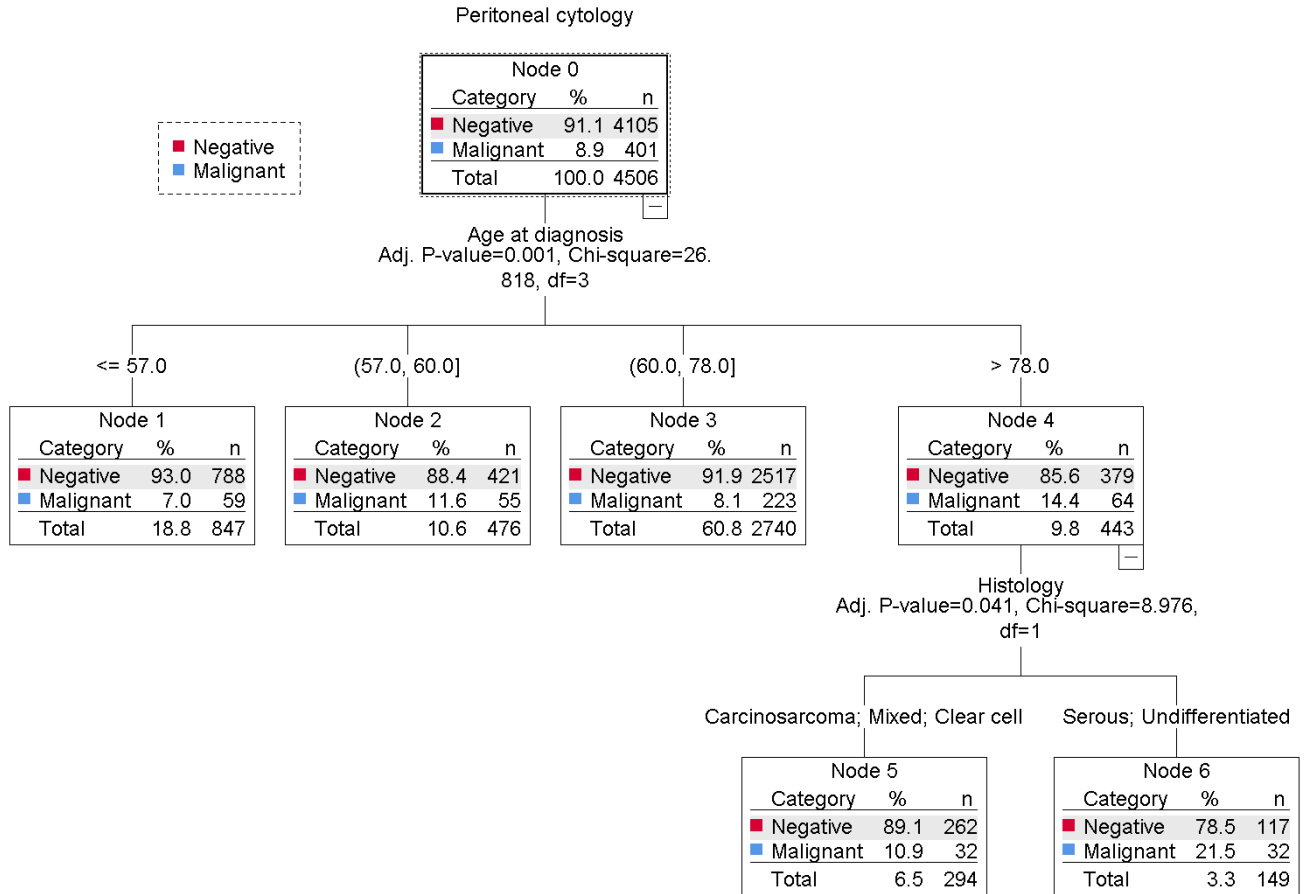

A recursive partitioning analysis was performed to construct a classification-tree model for patterns of malignant peritoneal cytology. All the independent characteristics for malignant peritoneal cytology in multivariable model (Table 1) are entered in the analysis. Women aged >78 years old with serous or undifferentiated histology types had a disproportionately high incidence of malignant peritoneal cytology of 21.5%.

**Supplemental Figure S3. Forest plots for cause-specific survival (weighted models).**

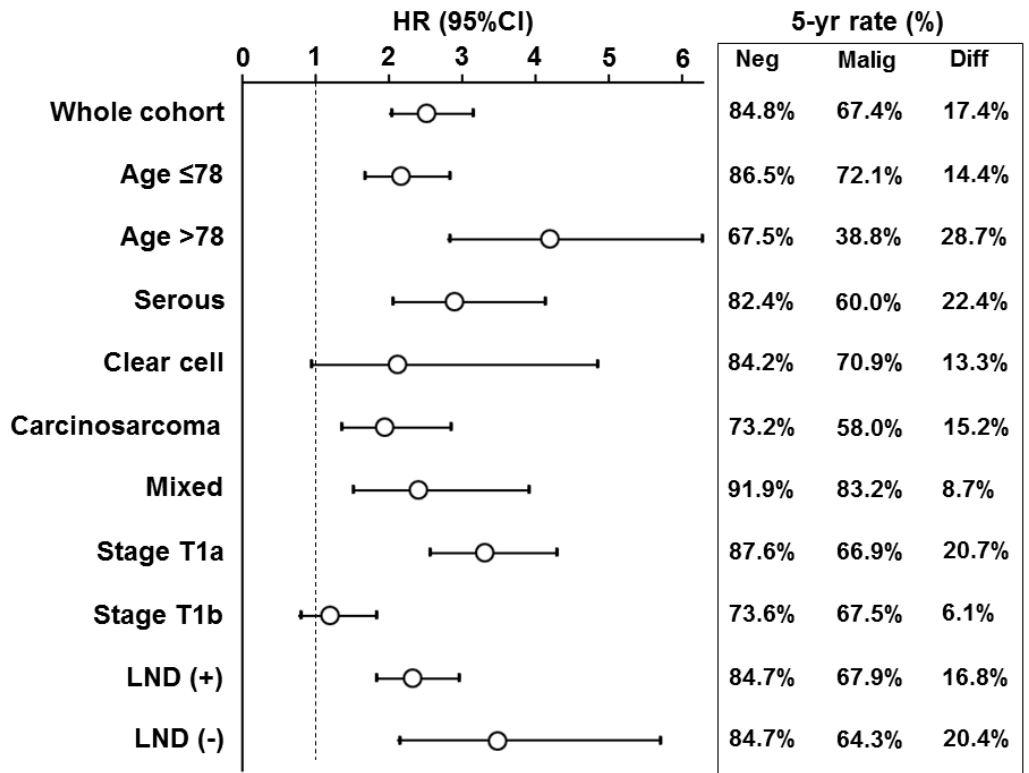

Association of peritoneal cytology (malignant *versus* negative) and cause-specific survival was assessed with Cox proportional hazard regression test in the PS-IPTW models. The 5-year survival rates and differences are shown. Circles represent HR, and bars represent 95%CI. Abbreviations: HR, hazard ratio; CI, confidence interval; LND, lymphadenectomy; Neg, negative peritoneal cytology; Malig, malignant peritoneal cytology; and Diff, difference in 5-year survival rate between the negative and malignant cytology groups.

**Supplemental Figure S4. Sensitivity analysis for overall survival (age, stage, and lymphadenectomy).**

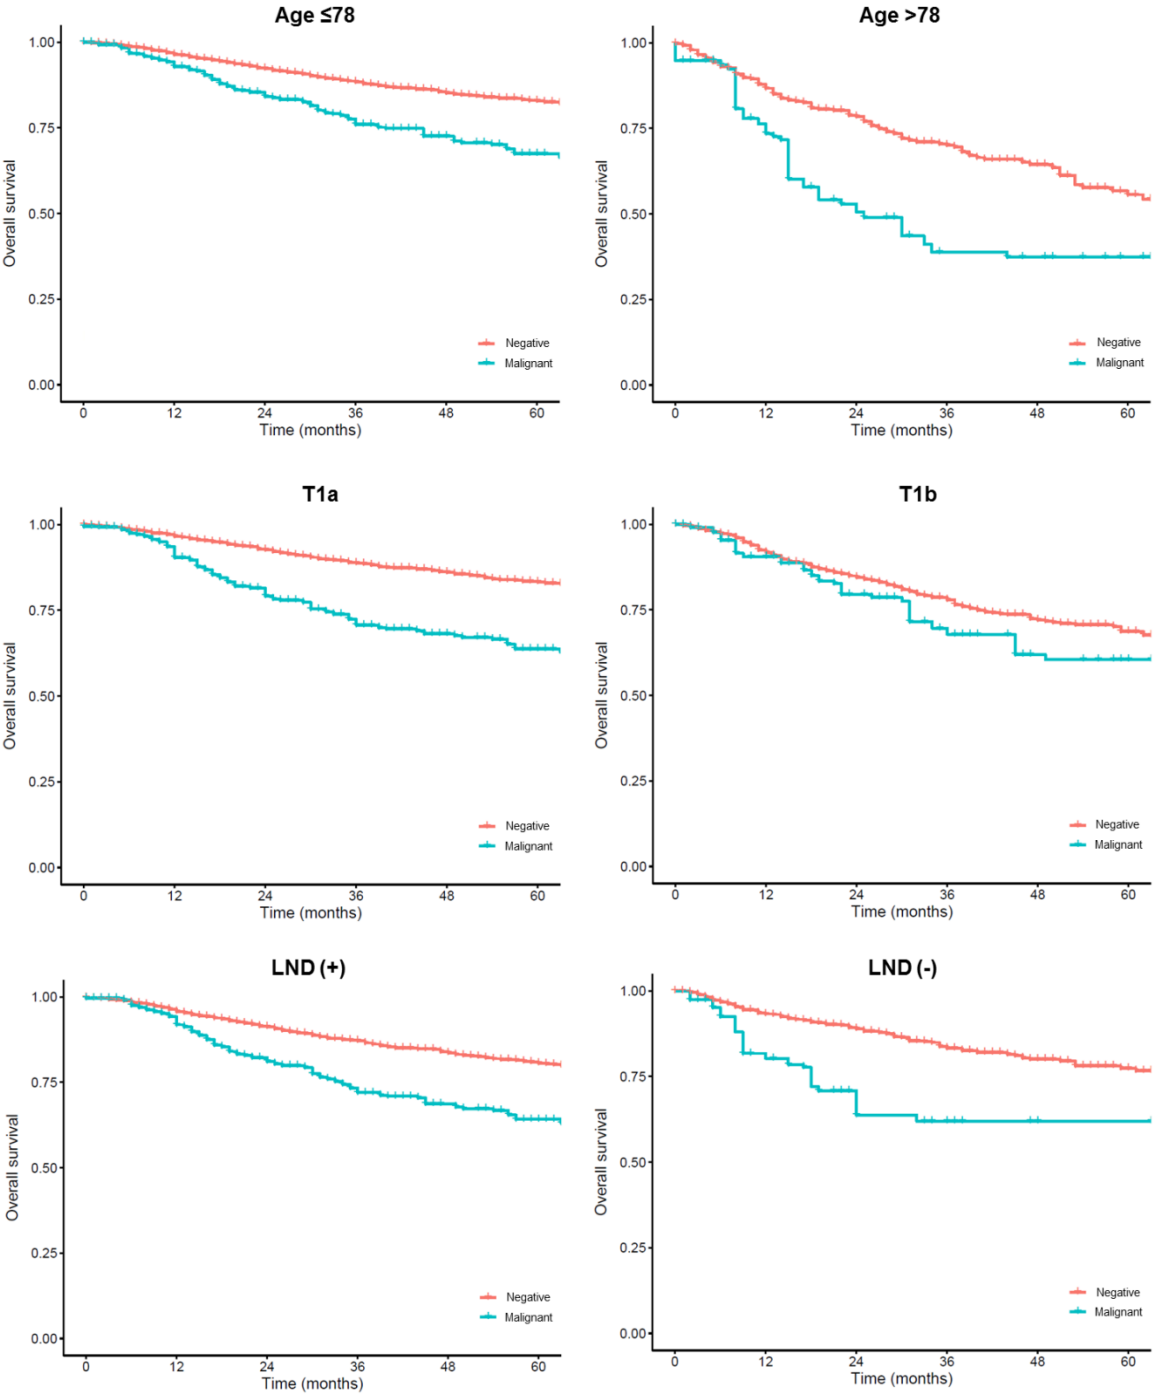

Survival curves for overall survival are shown per peritoneal cytology status. All weighted models. Survival statistics are shown in Figure 5. When the study cohort was restricted to stage IA disease, the 5-year overall survival rate was 82.9% for unstaged cases with negative peritoneal cytology, 83.3% for staged cases with negative peritoneal cytology, 60.4% for unstaged cases with malignant peritoneal cytology, and 61.2% for staged cases with malignant peritoneal cytology.

**Supplemental Figure S5. Overall survival per postop therapy type stratified by peritoneal cytology status.**

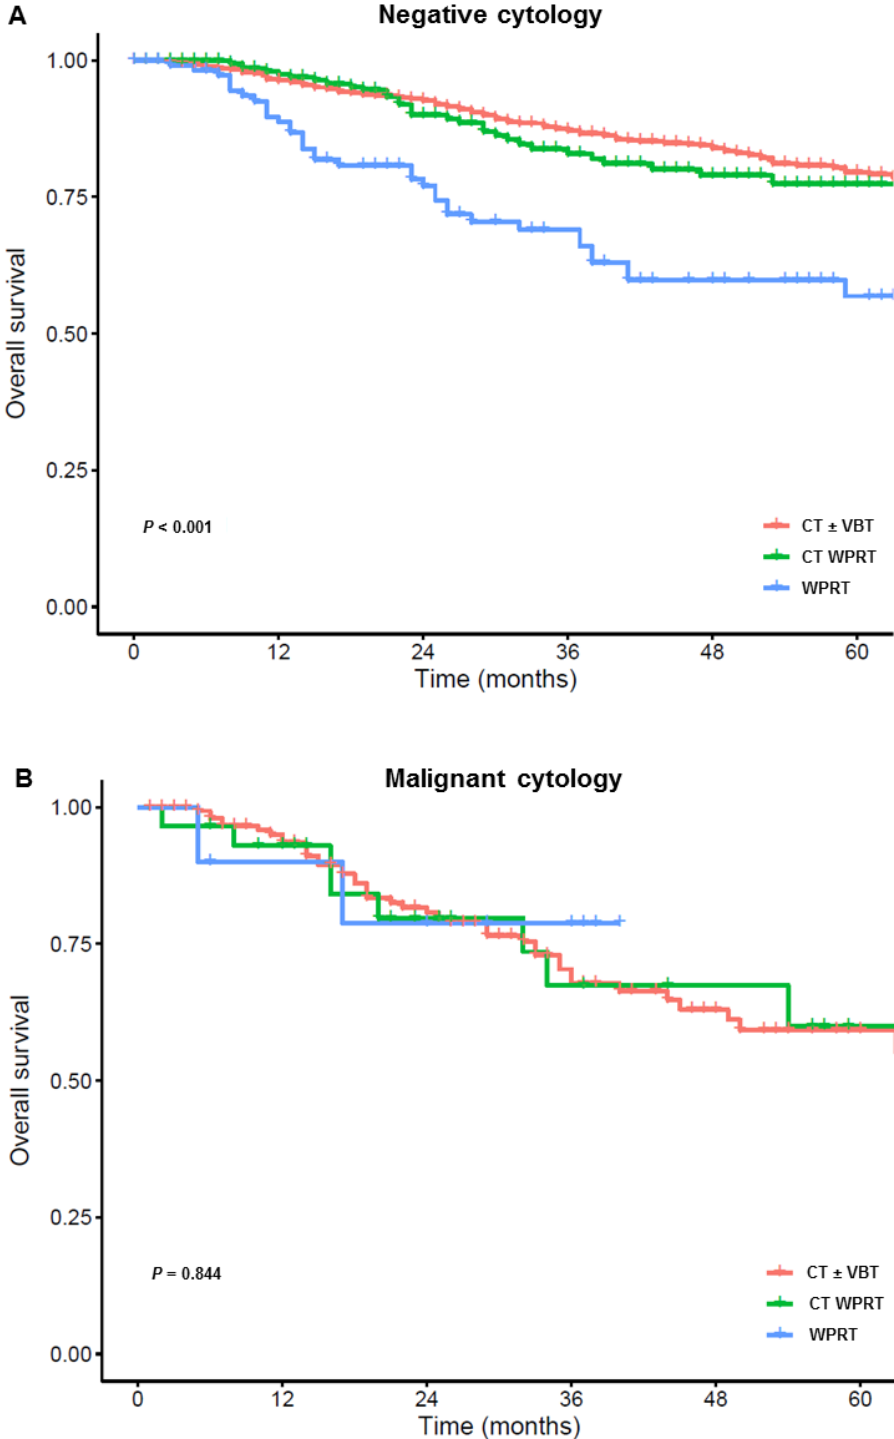

Log-rank test for  $P$ -values. Serous, clear cell, and uterine carcinosarcoma cases were examined. Survival curves are shown for **(A)** negative peritoneal cytology cases and **(B)** malignant peritoneal cytology cases. Abbreviations: CT, chemotherapy; VBT, vaginal brachytherapy; and WPRT, whole pelvic radiotherapy.

**Supplemental Table S1. Patient demographics per peritoneal cytology status (N=4506).**

| Characteristics               | Negative     | Malignant   |
|-------------------------------|--------------|-------------|
| No.                           | n=4105       | n=401       |
| <b>Age (yr)</b>               |              |             |
| ≤57                           | 788 (93.0%)  | 59 (7.0%)   |
| 58-60                         | 421 (88.4%)  | 55 (11.6%)  |
| 61-78                         | 2517 (91.9%) | 223 (8.1%)  |
| >78                           | 379 (85.6%)  | 64 (14.4%)  |
| <b>Year</b>                   |              |             |
| 2010                          | 489 (91.1%)  | 48 (8.9%)   |
| 2011                          | 528 (91.5%)  | 49 (8.5%)   |
| 2012                          | 587 (91.1%)  | 57 (8.9%)   |
| 2013                          | 615 (90.4%)  | 65 (9.6%)   |
| 2014                          | 603 (91.6%)  | 55 (8.4%)   |
| 2015                          | 638 (91.7%)  | 58 (8.3%)   |
| 2016                          | 645 (90.3%)  | 69 (9.7%)   |
| <b>Race/ethnicity</b>         |              |             |
| White                         | 2581 (90.4%) | 275 (9.6%)  |
| Black                         | 680 (93.3%)  | 49 (6.7%)   |
| Hispanic                      | 443 (91.7%)  | 40 (8.3%)   |
| Asian                         | 352 (91.4%)  | 33 (8.6%)   |
| Others                        | 28 (96.6%)   | 1 (3.4%)    |
| Unknown                       | 21 (87.5%)   | 3 (12.5%)   |
| <b>Marital status</b>         |              |             |
| Single                        | 669 (90.5%)  | 70 (9.5%)   |
| Married                       | 2033 (90.4%) | 215 (9.6%)  |
| Divorced                      | 514 (93.5%)  | 36 (6.5%)   |
| Separated                     | 48 (90.6%)   | 5 (9.4%)    |
| Widowed                       | 632 (91.9%)  | 56 (8.1%)   |
| Unmarried/domestic            | 15 (93.8%)   | 1 (6.3%)    |
| Unknown                       | 194 (91.5%)  | 18 (8.5%)   |
| <b>Insurance</b>              |              |             |
| Yes                           | 3988 (91.2%) | 385 (8.8%)  |
| No                            | 69 (89.6%)   | 8 (10.4%)   |
| Unknown                       | 48 (85.7%)   | 8 (10.4%)   |
| <b>Registry area</b>          |              |             |
| West                          | 2074 (90.6%) | 214 (9.4%)  |
| Central                       | 770 (92.5%)  | 62 (7.5%)   |
| East                          | 1261 (91.0%) | 125 (9.0%)  |
| <b>Histology type</b>         |              |             |
| Serous                        | 1294 (89.2%) | 156 (10.8%) |
| Clear cell                    | 248 (89.2%)  | 30 (10.8%)  |
| Carcinosarcoma                | 877 (91.5%)  | 81 (8.5%)   |
| Mixed                         | 1653 (92.6%) | 132 (7.4%)  |
| Undifferentiated              | 33 (94.3%)   | 2 (5.7%)    |
| <b>Tumor differentiation</b>  |              |             |
| Well                          | 434 (93.9%)  | 28 (6.1%)   |
| Moderate                      | 381 (92.5%)  | 31 (7.5%)   |
| Poor                          | 2289 (90.4%) | 242 (9.6%)  |
| Unknown                       | 1001 (90.9%) | 100 (9.1%)  |
| <b>T stage</b>                |              |             |
| IA                            | 3161 (91.5%) | 292 (8.5%)  |
| IB                            | 823 (89.4%)  | 98 (10.6%)  |
| I NOS                         | 121 (91.7%)  | 11 (8.3%)   |
| <b>Pelvic lymphadenectomy</b> |              |             |
| No                            | 688 (92.0%)  | 60 (8.0%)   |
| Yes                           | 3394 (90.9%) | 340 (9.1%)  |

|                             |              |             |
|-----------------------------|--------------|-------------|
| Unknown                     | 23 (95.8%)   | 1 (4.2%)    |
| Para-aortic lymphadenectomy |              |             |
| No                          | 1829 (92.1%) | 157 (7.9%)  |
| Yes                         | 2245 (90.2%) | 243 (9.8%)  |
| Unknown                     | 31 (96.9%)   | 1 (3.1%)    |
| Tumor size (cm)             |              |             |
| ≤2.0                        | 830 (92.5%)  | 67 (7.5%)   |
| 2.1-4.0                     | 1191 (90.8%) | 121 (9.2%)  |
| 4.1-6.0                     | 711 (88.3%)  | 94 (11.7%)  |
| 6.1-8.0                     | 284 (90.2%)  | 31 (9.8%)   |
| >8.0                        | 205 (91.5%)  | 19 (8.5%)   |
| Unknown                     | 884 (92.8%)  | 69 (7.2%)   |
| Hysterectomy type           |              |             |
| Simple                      | 3757 (91.3%) | 359 (8.7%)  |
| Modified / radical          | 201 (88.9%)  | 25 (11.1%)  |
| Supracervical               | 20 (90.9%)   | 2 (9.1%)    |
| NOS                         | 127 (89.4%)  | 15 (10.6%)  |
| Postop therapy              |              |             |
| None                        | 1705 (94.0%) | 108 (6.0%)  |
| VBT / chemo                 | 800 (88.9%)  | 100 (11.1%) |
| Chemo                       | 783 (87.1%)  | 116 (12.9%) |
| VBT                         | 337 (94.7%)  | 19 (5.3%)   |
| WPRT / chemo                | 279 (88.0%)  | 38 (12.0%)  |
| WPRT                        | 190 (90.9%)  | 19 (9.1%)   |
| RT NOS / chemo              | 7 (100%)     | 0           |
| RT NOS                      | 4 (80%)      | 1 (20%)     |

Number (percentage per row) is shown. Abbreviations: NOS, not otherwise significant; VBT, vaginal brachytherapy; WPRT, whole pelvic radiotherapy; RT, radiotherapy; and chemo, chemotherapy.

**Supplemental Table S2. Patient demographics after PS-IPTW.**

| Characteristics             | Negative     | Malignant   | P-value |
|-----------------------------|--------------|-------------|---------|
| No.                         | n=4116       | n=489       |         |
| Age (yr)                    | 65.4 (10.0)  | 65.9 (10.5) | 0.374   |
| Year                        |              |             | 0.986   |
| 2010                        | 490 (11.9%)  | 55 (11.2%)  |         |
| 2011                        | 528 (12.8%)  | 64 (13.1%)  |         |
| 2012                        | 588 (14.3%)  | 68 (13.9%)  |         |
| 2013                        | 621 (15.1%)  | 72 (14.7%)  |         |
| 2014                        | 600 (14.6%)  | 67 (13.7%)  |         |
| 2015                        | 636 (15.5%)  | 81 (16.5%)  |         |
| 2016                        | 652 (15.8%)  | 83 (16.9%)  |         |
| Race/ethnicity              |              |             | 0.983   |
| White                       | 2609 (63.4%) | 316 (64.8%) |         |
| Black                       | 666 (16.2%)  | 73 (15.0%)  |         |
| Hispanic                    | 441 (10.7%)  | 52 (10.7%)  |         |
| Asian                       | 352 (8.5%)   | 43 (8.8%)   |         |
| Others                      | 27 (0.7%)    | 2 (0.4%)    |         |
| Unknown                     | 22 (0.5%)    | 2 (0.4%)    |         |
| Marital status              |              |             | 0.991   |
| Single                      | 675 (16.4%)  | 83 (17.0%)  |         |
| Married                     | 2053 (49.9%) | 246 (50.4%) |         |
| Divorced                    | 503 (12.2%)  | 59 (12.1%)  |         |
| Separated                   | 48 (1.2%)    | 4 (0.8%)    |         |
| Widowed                     | 629 (15.3%)  | 74 (15.2%)  |         |
| Unmarried/domestic          | 15 (0.4%)    | 1 (0.2%)    |         |
| Unknown                     | 194 (4.7%)   | 21 (4.3%)   |         |
| Insurance                   |              |             | 0.943   |
| Yes                         | 3995 (97.1%) | 476 (97.1%) |         |
| No                          | 70 (1.7%)    | 8 (1.6%)    |         |
| Unknown                     | 51 (1.2%)    | 6 (1.2%)    |         |
| Registry area               |              |             | 0.860   |
| West                        | 2090 (50.8%) | 256 (52.4%) |         |
| Central                     | 760 (18.5%)  | 86 (17.6%)  |         |
| East                        | 1266 (30.8%) | 147 (30.1%) |         |
| Histology type              |              |             | 0.981   |
| Serous                      | 1325 (32.2%) | 158 (32.4%) |         |
| Clear cell                  | 254 (6.2%)   | 30 (6.1%)   |         |
| Carcinosarcoma              | 875 (21.3%)  | 110 (22.5%) |         |
| Mixed                       | 1630 (39.6%) | 186 (38.1%) |         |
| Undifferentiated            | 32 (0.8%)    | 4 (0.8%)    |         |
| Tumor differentiation       |              |             | 0.682   |
| Well                        | 422 (10.3%)  | 47 (9.6%)   |         |
| Moderate                    | 376 (9.1%)   | 40 (8.2%)   |         |
| Poor                        | 2313 (56.2%) | 292 (59.7%) |         |
| Unknown                     | 1005 (24.4%) | 110 (22.5%) |         |
| T stage                     |              |             | 0.516   |
| IA                          | 3153 (76.6%) | 361 (73.8%) |         |
| IB                          | 842 (20.5%)  | 113 (23.1%) |         |
| I NOS                       | 121 (2.9%)   | 15 (3.1%)   |         |
| Pelvic lymphadenectomy      |              |             | 0.881   |
| No                          | 683 (16.6%)  | 79 (16.2%)  |         |
| Yes                         | 3411 (82.9%) | 408 (83.4%) |         |
| Unknown                     | 22 (0.5%)    | 2 (0.4%)    |         |
| Para-aortic lymphadenectomy |              |             | 0.678   |
| No                          | 1814 (44.1%) | 211 (43.1%) |         |
| Yes                         | 2273 (55.2%) | 277 (56.5%) |         |



|                    |              |             |       |
|--------------------|--------------|-------------|-------|
| Unknown            | 29 (0.7%)    | 2 (0.4%)    |       |
| Tumor size (cm)    |              |             | 0.797 |
| ≤2.0               | 819 (19.9%)  | 93 (19.0%)  |       |
| 2.1-4.0            | 1198 (29.1%) | 138 (28.2%) |       |
| 4.1-6.0            | 736 (17.9%)  | 100 (20.4%) |       |
| 6.1-8.0            | 288 (7.0%)   | 39 (8.0%)   |       |
| >8.0               | 205 (5.0%)   | 26 (5.3%)   |       |
| Unknown            | 870 (21.1%)  | 93 (19.0%)  |       |
| Hysterectomy type  |              |             | 0.840 |
| Simple             | 3761 (91.4%) | 451 (92.4%) |       |
| Modified / radical | 206 (5.0%)   | 21 (4.3%)   |       |
| Supracervical      | 20 (0.5%)    | 1 (0.2%)    |       |
| NOS                | 130 (3.2%)   | 15 (3.1%)   |       |
| Postop therapy     |              |             | 0.942 |
| None               | 1656 (40.2%) | 189 (38.6%) |       |
| VBT / chemo        | 822 (20.0%)  | 97 (19.8%)  |       |
| Chemo              | 821 (19.9%)  | 108 (22.0%) |       |
| VBT                | 325 (7.9%)   | 35 (7.1%)   |       |
| WPRT / chemo       | 290 (7.0%)   | 37 (7.6%)   |       |
| WPRT               | 191 (4.6%)   | 23 (4.7%)   |       |
| RT NOS / chemo     | 6 (0.1%)     | 0           |       |
| RT NOS             | 5 (0.1%)     | 1 (0.2%)    |       |

Total number may not be 4605 due to weighted value. Abbreviations: PS-IPTW, propensity score inverse probability of treatment weighting; NOS, not otherwise significant; VBT, vaginal brachytherapy; WPRT, whole pelvic radiotherapy; RT, radiotherapy; and chemo, chemotherapy.
